# Supplementary material for: Primary care for people with severe mental illness and comorbid obstructive airways disease: a qualitative study of patient perspectives with integrated stakeholder feedback
Source: HighWire-hosted journal article supplement (doi:10.1136/bmjopen-2021-057143), 2022-03-01

Appendix 2:  
Infographics from the stakeholder meeting conducting in January 2020.

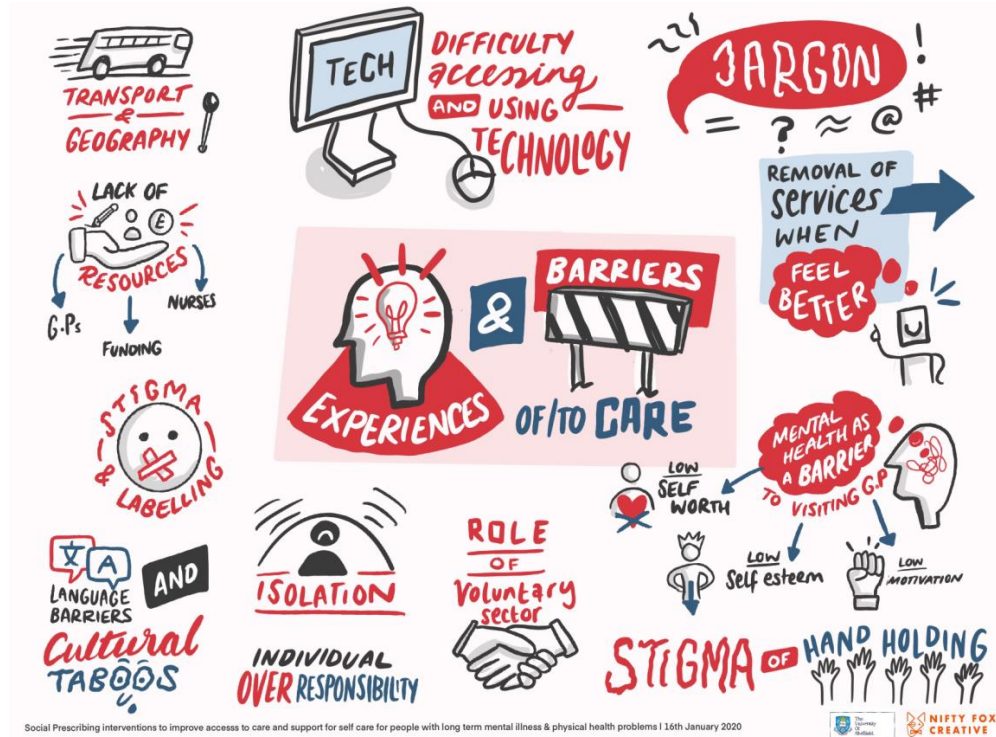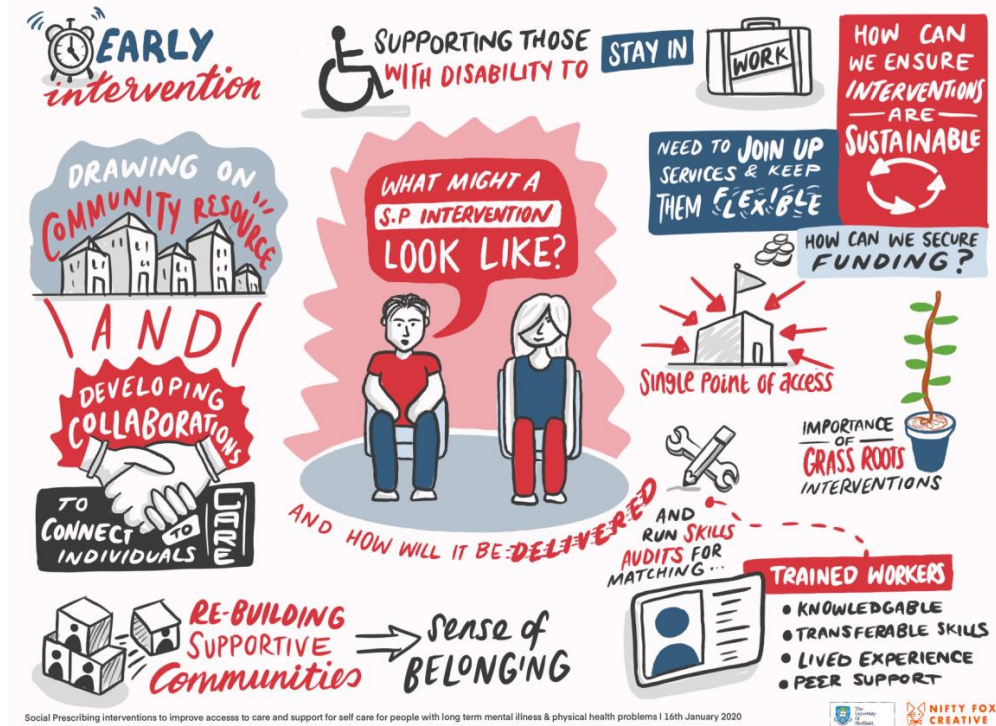

Supplement: bmjopen-2021-057143supp002_data_supplement.pdf [file bmjopen-2021-057143supp002_data_supplement.pdf]
